# Supplementary material
Source: PubMed Central journal article supplement (PMC1913780)
Supplement: plntphys_pp.106.095273_1.pdf [file plntphys_pp.106.095273_1.pdf]

Supplemental movie

Reconstruction of the 3D tubular vacuoles in a papilla cell before pollination using IMOD software. A branching vacuolar network (yellow) was connected to the large vacuole (blue) at several locations. The cell surface and cell membrane are shown in green and pink, respectively.
